# Supplementary material
Source: PubMed Central journal article supplement (PMC5740256)
Supplement: BPH-175-154-s001.pdf [file BPH-175-154-s001.pdf]

# Supplementary Fig 1.

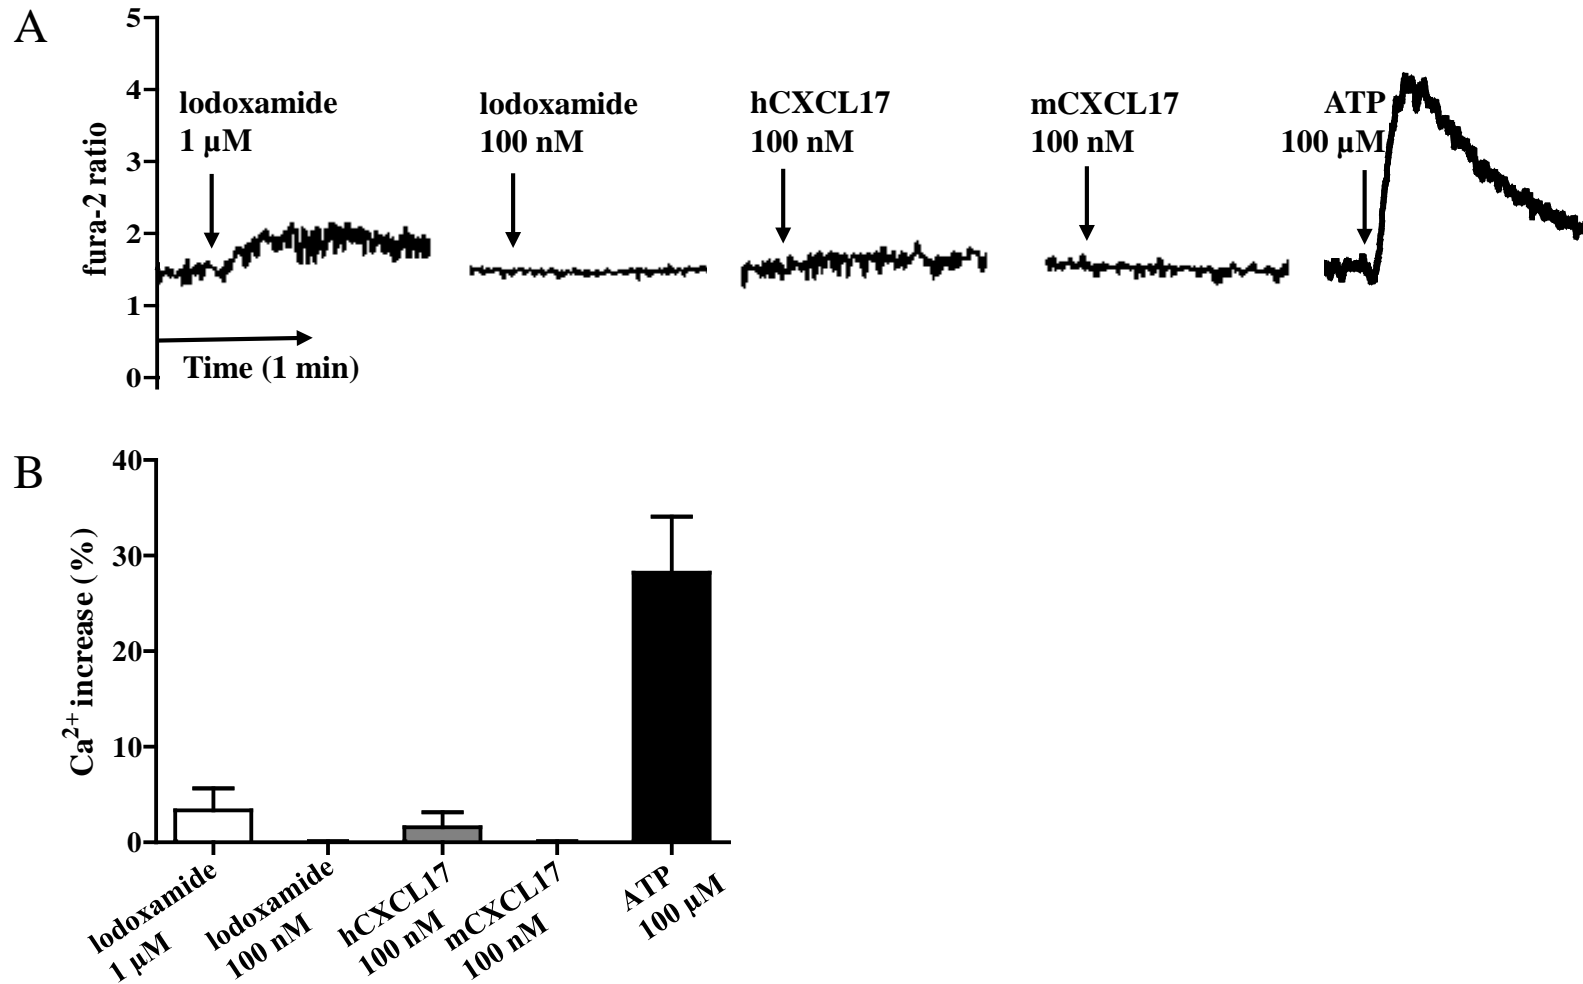

**Fig 1. Effects of lodoxamide, CXCL17, and APT on intracellular Ca<sup>2+</sup> concentrations in THP-1 cells.** A) Representative [Ca<sup>2+</sup>]<sub>i</sub> traces of THP-1 cells treated with lodoxamide (100 nM or 1 mM), hCXCL17 (100 nM), mCXCL17 (100 nM), or ATP (100 mM). Arrows indicate when compounds were added. B) Histogram of Ca<sup>2+</sup> responses. Results are presented as the means  $\pm$  SEs of three independent experiments.

## Supplementary Fig 2.

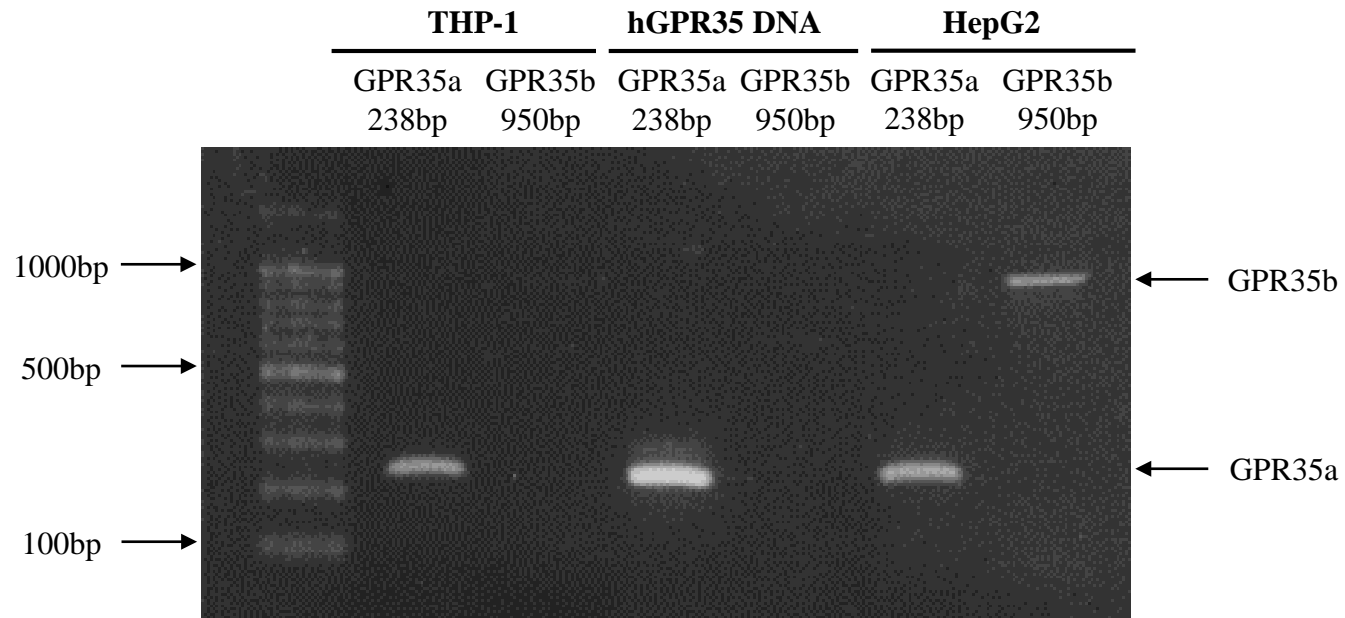

### Figure 2. THP-1 cells express GPR35a

RT-PCR was conducted to detect GPR35a and GPR35b. THP-1 cells expressed mainly GPR35a and we used GPR35a. Primer sequences are followings.

hGPR35a Forward GTGTTTCGTGGTCTGCTTCCT,

hGPR35b Forward GTCCTTGCGTCTCTCTGACC,

hGPR35 Reverse GAGAGTCCTGGCTTTTGTGG

Supplementary Fig 3.

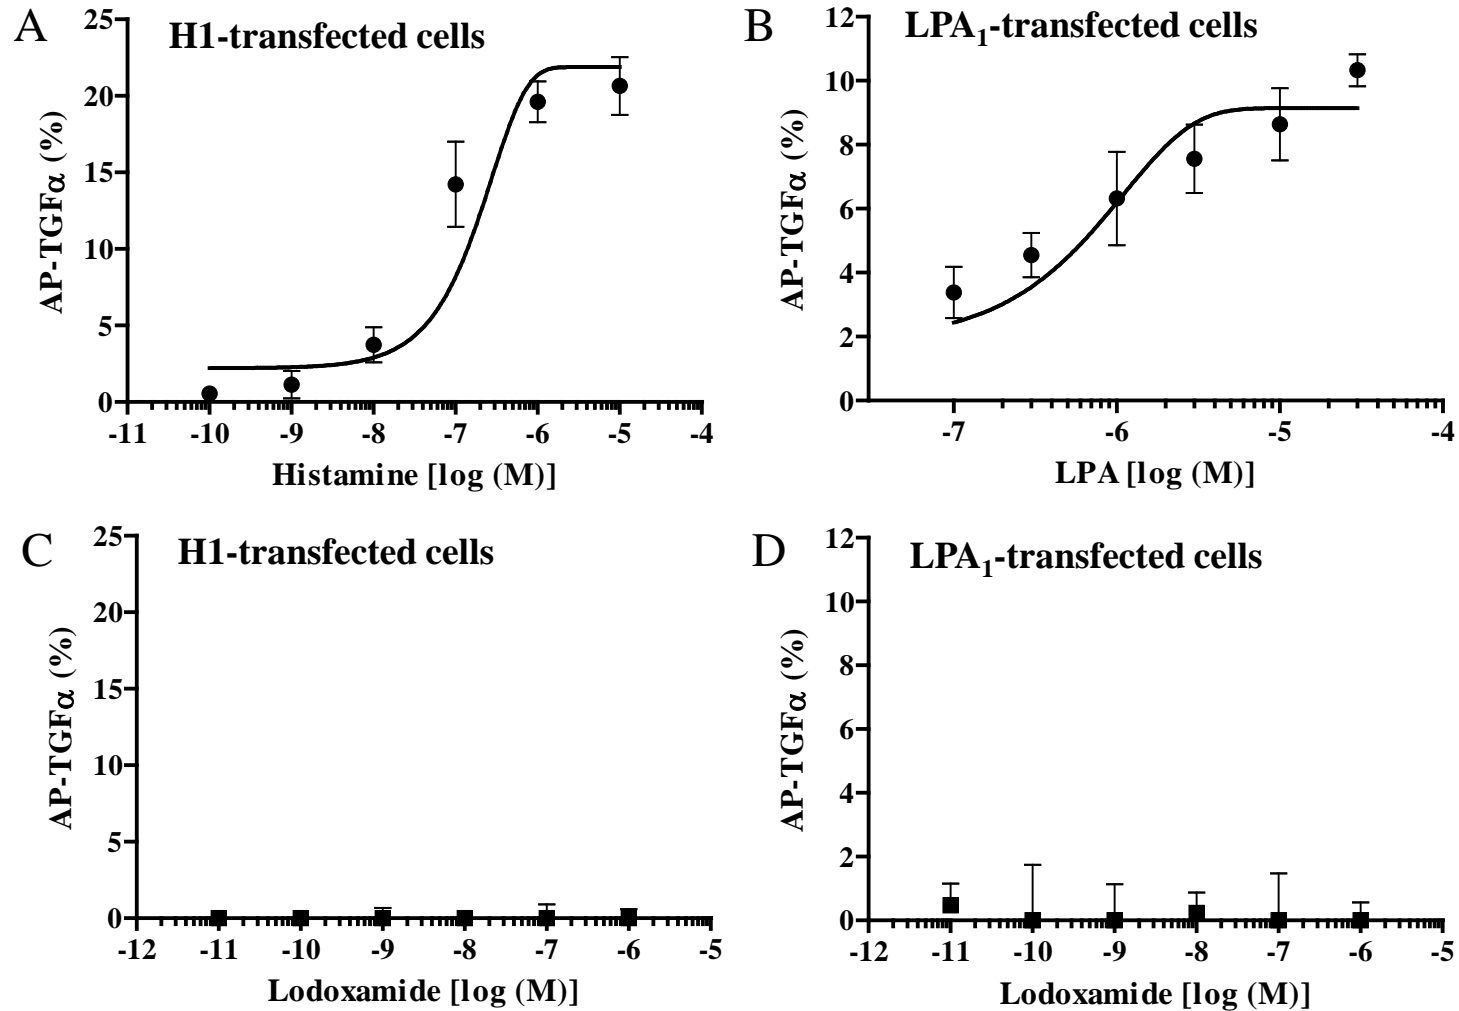

**Figure 3. Lodoxamide did not induce activation of H1 histamine or LPA1 lysophosphatidic acid receptor** Concentration-response curves of histamine (A), LPA (B), and lodoxamide (C and D) as determined by the AP-TGF $\alpha$  shedding assay in H1 or LPA1 coexpressed with a mixture of eight G $\alpha$  proteins in HEK-293 cells. Results are presented as the means  $\pm$  SEs of 3 individual experiments.
